# Supplementary material for: Expression of MicroRNAs in Periodontal Disease: A Systematic Review
Source: Hindawi journal article supplement (doi:10.1155/2021/2069410), 2021-01-01
Supplement: f1 [file 2069410.f1.pdf]

|                        |                           |             |          | IDENTIFICATION PHASE              |                                                                                                                                                 |                                                                     |                                               |            | VALIDATION PHASE                |                                                                 |                      |                       |                                        |                                              |      |
|------------------------|---------------------------|-------------|----------|-----------------------------------|-------------------------------------------------------------------------------------------------------------------------------------------------|---------------------------------------------------------------------|-----------------------------------------------|------------|---------------------------------|-----------------------------------------------------------------|----------------------|-----------------------|----------------------------------------|----------------------------------------------|------|
| Autor                  | Type of sample            | Sample size |          | Periodontopathy                   | miRNAs Profiling Method                                                                                                                         | RNA Isolation Method                                                | miRNA selection fold change >2, p value <0.05 | Validation | TaqMan Micro RNA assay/ qRT-PCR | RNA Isolation Method                                            | Quality RNA analysis | Normalization control | Specificity and sensitivity statistics | MicroRNAs detectados                         | REF  |
|                        |                           | Cases       | Controls |                                   |                                                                                                                                                 |                                                                     |                                               |            |                                 |                                                                 |                      |                       |                                        |                                              |      |
| Yoneda T. (2019)       | serum                     | 30          | 30       | Chronic periodontitis             | Microarray                                                                                                                                      | 3D-Gene® RNA extraction                                             | yes                                           | yes        | yes                             | microRNA Extractor SP kit (Wako, Osaka, Japan)                  | yes                  | U6 snRNA              | yes                                    | hsa-miR-664a-3p hsa-miR-501-5p hsa-miR-21-3p | (19) |
| Nisha KJ (2019)        | Saliva                    | 32          | 32       | Chronic periodontitis             | NGS/RNAseq                                                                                                                                      | TRIzol Reagent (Invitrogen), Thermo Fisher Scientific, Waltham, MA. | yes                                           | yes        | N/D                             | RNAzol Kit, Chromous Biotech Pvt., Bangalore, India.            | yes                  | RNU6-2                | N/D                                    | hsa-miR-143-3p                               | (22) |
| Fujimori K. (2019)     | saliva                    | 120         | -        | chronic periodontitis             | The Inflammatory Response and Autoimmunity miScript miRNAs PCR Array. (SA Biosciences, Frederick, MD)                                           | Total exosome RNA isolation kits (Invitrogen, Carlsbad, CA, USA)    | yes                                           | yes        | yes                             | Total exosome RNA isolation kits (Invitrogen, Carlsbad, CA, USA | yes                  | U6 snRNA              | N/D                                    | hsa-381-3p                                   | (23) |
| Jianjia L (2018)       | Gingival tissue           | 16          | 16       | Chronic periodontitis             | Microarray (miRNA profiling in inflamed gingiva from                                                                                            | N/D                                                                 | N/D                                           | yes        | N/D                             | RNAiso Plus (Takara Bio Inc., Dalian, China)                    | N/D                  | U6 snRNA              | N/D                                    | miR-144- 5p miR-204                          | (24) |
| Micó-Martínez P (2018) | Gingival crevicular fluid | 9           | 9        | moderate and severe periodontitis | ND (mirPath v3 KEGG Reverse Search (selecting the method TarBase v7.0)) ND (mirPath v3 KEGG Reverse Search (selecting the method TarBase v7.0)) | N/D                                                                 | N/D                                           | N/D        | yes                             | miRNeasy Serum/ Plasma kit (Qiagen, CA. USA).                   | N/D                  | hsa-miR-16-5p (000391 | N/D                                    | miR-1226-5p                                  | (25) |

|                   |                           |    |    |                                      |                                                                                                    |                                                                                                |     |     |     |     |     |       |     |                                                                                                                                                                                                                                                                                                                                                                                                                                                                                                                        |      |
|-------------------|---------------------------|----|----|--------------------------------------|----------------------------------------------------------------------------------------------------|------------------------------------------------------------------------------------------------|-----|-----|-----|-----|-----|-------|-----|------------------------------------------------------------------------------------------------------------------------------------------------------------------------------------------------------------------------------------------------------------------------------------------------------------------------------------------------------------------------------------------------------------------------------------------------------------------------------------------------------------------------|------|
| Amaral SA. (2018) | Periodontal tissue        | 18 | -  | Chronic and aggressive periodontitis | TaqMan® OpenArray® Human MicroRNA Panel, Applied Biosystems                                        | miRNA isolation kit (Ambion mirVana™ miRNA Isolation Kit, Life Technologies, Vilnius, LT, USA) | N/D | N/D | N/D | N/D | N/D |       | N/D | hsa-miR-1274b, hsa-let-7b-5p, hsa-miR-24-3p, hsa-miR-19b-3p, hsa-miR-720, hsa-miR-126-3p, hsa-miR-17-3p                                                                                                                                                                                                                                                                                                                                                                                                                | (26) |
| Ghotloo S.        | Gingival tissue           | 18 | 10 | Generalized aggressive periodontitis |                                                                                                    |                                                                                                | N/D | N/D | N/D | N/D | N/D |       | N/D | miR-146a                                                                                                                                                                                                                                                                                                                                                                                                                                                                                                               | (27) |
| Radović N. (2018) | Gingival crevicular fluid | 48 | 48 | Chronic periodontitis                |                                                                                                    |                                                                                                | N/D | N/D | N/D | N/D | N/D |       | N/D | miR-146a<br>miR-155                                                                                                                                                                                                                                                                                                                                                                                                                                                                                                    | (28) |
| Hee Sam Na (2016) | Gingival tissue           | 14 | -  | Chronic periodontitis                | miRNA PCR array, systemRT2 miRNA PCR array system, SABiosciences, Frederick, MD                    | miRNA isolation kitAmbion, Thermo Fisher Scientific, Waltham, MA.                              | N/D | N/D | N/D | N/D | N/D | RNU44 | N/D | miRNA-15b<br>miRNA-211<br>miRNA-372<br>miRNA-656<br>miRNA-128<br>miRNA-34a<br>miRNA-38                                                                                                                                                                                                                                                                                                                                                                                                                                 | (29) |
| Saito A. (2017)   | Gingival crevicular fluid | 11 | 9  | non specify                          | miRNA PCR panel (Exiqon). miRCURY LNATM Universal RT microRNA PCR System (Exiqon, Vedbæk, Denmark) | Trizol LS reagent (Life Technologies, Carlsbad, CA, USA)                                       | N/D | yes | N/D | N/D | N/D | N/D   | N/D | hsa-miR-19a-3p<br>hsa-miR-181b-5p<br>hsa-miR-155-5p<br>hsa-miR-200b-3p<br>hsa-miR-125b-5p<br>hsa-miR-31-3p<br>hsa-miR-100-5p<br>hsa-miR-205-5p<br>hsa-miR-223-3p<br>hsa-miR-200a-5p<br>hsa-let-7e-5p<br>hsa-miR-30e-5p<br>hsa-miR-200c-5p<br>hsa-miR-140-5p<br>hsa-miR-125a-5p<br>hsa-miR-187-3p<br>hsa-miR-338-3p<br>hsa-miR-590-5p<br>hsa-miR-101-3p<br>hsa-miR-200c-3p<br>hsa-miR-21-3p<br>hsa-let-7f-5p<br>hsa-miR-320a<br>hsa-miR-301a-3p<br>hsa-miR-99a-5p<br>hsa-miR-194-5p<br>hsa-miR-145-5p<br>hsa-miR-30e-3p | (30) |

|                            |                 |     |    |                       |                             |     |     |     |     |                                      |     |     |     |                                                                                                                                                                                                                      |      |
|----------------------------|-----------------|-----|----|-----------------------|-----------------------------|-----|-----|-----|-----|--------------------------------------|-----|-----|-----|----------------------------------------------------------------------------------------------------------------------------------------------------------------------------------------------------------------------|------|
|                            |                 |     |    |                       |                             |     |     |     |     |                                      |     |     |     | hsa-miR-222-3p<br>hsa-miR-26b-5p<br>hsa-miR-144-3p<br>hsa-miR-582-5p<br>hsa-miR-20a-3p<br>hsa-miR-374a-5p<br>hsa-miR-20a-5p<br>hsa-miR-126-5p<br>hsa-miR-200b-5p<br>hsa-miR-144-5p<br>hsa-miR-203a<br>hsa-miR-210-3p |      |
| Motedayyen H. (2015)       | Gingival tissue | 20  | 10 | Chronic periodontitis | N/D                         |     | N/D | N/D | N/D | N/D                                  | N/D | N/D | N/D | has-miR-146a                                                                                                                                                                                                         | (31) |
| Stoecklin-Wasmer C. (2012) | Gingival tissue | 158 | 40 | Non-specified         | Microarray Agilent Platform | N/D | N/D | yes | N/D | N/D                                  | N/D | N/D | N/D | hsa-miR-451<br>hsa-miR-223<br>hsa-miR-486-5p<br>hsa-miR-1246<br>hsa-miR-1260<br>hsa-miR-141                                                                                                                          | (32) |
| Yu-feng Xie (2011)         | Gingival tissue | 10  | 10 | Chronic periodontitis | N/D                         | N/D | N/D | Yes | N/D | Trizol reagent (Invitrogen, CA, USA) | N/D | N/D | N/D | hsa-miR-146a<br>hsa-miR-146b<br>hsa-miR-155                                                                                                                                                                          | (33) |

Characteristics of the included studies, the different study variables are described, the analysis was carried out in two phases: identification phase where data was collected as identification method of miRNAs, RNA isolation method as well as whether the validation of the same. In a second phase, the validation phase was analyzed, where information related to the processing of the samples was collected.
